# Supplementary material
Source: PubMed Central journal article supplement (PMC4309708)
Supplement: AEM.03413-14_zam999116016so1.pdf [file AEM.03413-14_zam999116016so1.pdf]

**Supplemental Table 1. Open Reading Frames deduced from Ldl1 and their predicted proteins**

| Gene | Start | End   | Length (aa) | kDa    | Strand | RBS/Start Codon <sup>a</sup> | Predicted Function                | Representative similarity to proteins in database <sup>b</sup>                       | Identity (aa) | e-value   |
|------|-------|-------|-------------|--------|--------|------------------------------|-----------------------------------|--------------------------------------------------------------------------------------|---------------|-----------|
| 1    | 101   | 547   | 149         | 16.39  | +      | aaagaggtaaaaaatg             |                                   |                                                                                      |               |           |
| 2    | 706   | 1077  | 124         | 13.64  | +      | ataggaggtatacaaaaatg         | DNA repair protein family protein | DNA repair protein RadC [Enterococcus faecium C1904]                                 | 28% (32)      | 2.00E-04  |
| 3    | 1092  | 1418  | 109         | 11.99  | +      | atgaaaggaaaaaatg             |                                   |                                                                                      |               |           |
| 4    | 1436  | 1765  | 110         | 12.1   | +      | caggaggttttaaatg             |                                   |                                                                                      |               |           |
| 5    | 3220  | 3339  | 40          | 4.4    | +      | tgaaaggagacaacaacatg         |                                   |                                                                                      |               |           |
| 6    | 3419  | 3805  | 129         | 14.19  | +      | aaactgaggttaaatg             |                                   |                                                                                      |               |           |
| 7    | 3811  | 3996  | 62          | 6.82   | +      | ttagaaagtgattattgtg          |                                   |                                                                                      |               |           |
| 8    | 4011  | 4166  | 52          | 5.72   | +      | ataggaagtgtagtaacatg         |                                   |                                                                                      |               |           |
| 9    | 4168  | 4938  | 257         | 28.27  | +      | cgatgggaagtaacatg            |                                   | fatty acid/phospholipid synthesis [Lactobacillus phage ATCC 8014-B2]                 | 27% (52)      | 0.02      |
| 10   | 5439  | 5852  | 138         | 15.18  | +      | gagatggtttaaatg              | HNH endonuclease                  | HNH endonuclease [Lactobacillus phage ATCC 8014-B2]                                  | 54% (71)      | 9.00E-46  |
| 11   | 5978  | 6385  | 136         | 14.96  | +      | tcaaaggagattctgacttg         | terminase small subunit           | terminase small subunit [Lactobacillus phage ATCC 8014-B2]                           | 35% (47)      | 9.00E-20  |
| 12   | 6372  | 8132  | 587         | 64.57  | +      | agccttaataagaatgacatg        | phage large subunit               | terminase large subunit [Lactobacillus phage ATCC 8014-B2]                           | 74% (336)     | 0.00E+00  |
| 13   | 8145  | 9626  | 494         | 54.34  | +      | gaaagaaggtgtttg              | portal                            | portal protein [Lactobacillus phage ATCC 8014-B2]                                    | 45% (168)     | 7.00E-101 |
| 14   | 9616  | 10770 | 385         | 42.35  | +      | taggaagtgaacaaagaagaagtg     | prohead protease                  | major capsid protein [Lactobacillus phage ATCC 8014-B2] (PROTEASE DOMAIN)            | 52% (100)     | 3.00E-48  |
| 15   | 10770 | 12041 | 424         | 46.64  | +      | gaaggagctgtccattatg          | phage major capsid                | major capsid protein [Lactobacillus phage ATCC 8014-B2]                              | 34% (148)     | 4.00E-63  |
| 16   | 12200 | 12835 | 212         | 23.32  | +      | gaaagaagcatagaaaatg          | HNH endonuclease                  | putative HNH homing endonuclease [Lactobacillus phage phiJL-1]                       | 52% (100)     | 8.00E-47  |
| 17   | 12884 | 13195 | 104         | 11.44  | +      | agaaaaggagaagggcttttg        |                                   | hypothetical protein 8014-B2_0026                                                    | 39% (25)      | 7.00E-05  |
| 18   | 13198 | 13578 | 127         | 13.97  | +      | aagaacggaaatctgacaatg        | head-tail adaptor                 | head-tail adaptor [Lactobacillus phage ATCC 8014-B2]                                 | 41% (77)      | 1.00E-25  |
| 19   | 13571 | 14056 | 162         | 17.82  | +      | atccagaaggaagggtg            | head-tail-joining protein         | head-tail joining protein [Lactobacillus phage ATCC 8014-B2]                         | 59% (17)      | 4.00E-04  |
| 20   | 14060 | 14515 | 152         | 16.72  | +      | cttgaggtaatatg               | tail protein                      | tail protein [Lactobacillus phage ATCC 8014-B2]                                      | 37% (36)      | 6.00E-10  |
| 21   | 14535 | 15182 | 216         | 23.76  | +      | aatggagaatataatatg           | major tail protein                | major tail protein [Lactobacillus phage ATCC 8014-B2]                                | 40% (79)      | 3.00E-40  |
| 22   | 15271 | 15883 | 204         | 24.1   | +      | agaaagagtggtataatattg        |                                   | conserved hypothetical protein [Lactobacillus paracasei subsp. paracasei ATCC 25302] | 22% (23)      | 3.30E-02  |
| 23   | 15936 | 23819 | 2628        | 289.08 | +      | gaaagtaggaatataatatg         | tape measure protein              | SLT domain protein [Lactobacillus pasteurii CRBIP 24.76]                             | 54% (308)     | 0         |
| 24   | 23888 | 26443 | 852         | 93.72  | +      | gaagaaggaaattaacacatg        | distal tail protein               | hypothetical protein HMPREF9024_01543 [Pediococcus acidilactici 7_4]                 | 35% (144)     | 1.00E-43  |
| 25   | 26466 | 28958 | 831         | 91.41  | +      | tagaaaggaattctccattatg       | Tal-like protein                  | hypothetical protein PEPE_0991 [Pediococcus pentosaceus ATCC 25745]                  | 36% (298)     | 2.00E-158 |

|    |       |       |      |        |   |                            |                                          |                                                                                                      |            |           |
|----|-------|-------|------|--------|---|----------------------------|------------------------------------------|------------------------------------------------------------------------------------------------------|------------|-----------|
| 26 | 28955 | 30541 | 529  | 58.19  | + | taaaggaggataccagaatg       | adsorption protein                       | adsorption protein [Lactobacillus delbrueckii subsp. bulgaricus ND02]                                | 41% (101)  | 1.00E-36  |
| 27 | 30519 | 34190 | 1224 | 134.64 | + | atttgaccatcgaaaaaatg       | adsorption protein                       | minor structural protein gp58 [Lactobacillus phage LL-H]                                             |            |           |
| 28 | 34208 | 34675 | 156  | 17.16  | + | aaaggagaactaatcatg         |                                          | hypothetical protein [Lactobacillus phage LL-H]                                                      | 74% (73)   | 5.00E-42  |
| 29 | 34686 | 34844 | 53   | 5.83   | + | aataggagaagcactatg         |                                          |                                                                                                      |            |           |
| 30 | 34930 | 35283 | 118  | 12.98  | + | agaaggagataatctttatg       |                                          | ORF 109 [Lactobacillus phage mv4]                                                                    | 31% (30)   | 3.00E-04  |
| 31 | 35296 | 35712 | 139  | 15.29  | + | aataggagaaaaaattatg        |                                          | holin [Lactobacillus jensenii SJ-7A-US]                                                              | 32% (39)   | 6.00E-07  |
| 32 | 35734 | 36045 | 104  | 11.44  | + | aaggaaaaagggttaatg         |                                          | GAF sensor hybrid histidine kinase [Methylobacterium sp. 4-46]                                       | 43% (29)   | 2.30E-02  |
| 33 | 36029 | 36463 | 145  | 15.95  | + | aaggagttaaatgaatatg        | holin                                    | holin [Lactobacillus phage phiPYB5]                                                                  | 50% (61)   | 2.00E-31  |
| 34 | 36477 | 37733 | 419  | 46.09  | + | aaaggagtattaatagtg         | lysine                                   | lysine [Lactobacillus delbrueckii subsp. bulgaricus ND02]                                            | 58% (180)  | 2.00E-106 |
| 35 | 37811 | 38788 | 326  | 35.86  | + | aagaaaagggaactatg          | recombinase/integrase                    | recombinase/integrase [Lactobacillus phage ATCC 8014-B2]                                             | 53% (171)  | 8.00E-118 |
| 36 | 38865 | 39710 | 282  | 31.02  | - | caagaaaaggagagttatg        | HNH endonuclease                         | putative endonuclease [Lactobacillus phage phiAT3]                                                   | 41% (104)  | 4.00E-54  |
| 37 | 39832 | 43569 | 1246 | 137.06 | - | aaggaggataaaacaagggtacaatg | DNA polymerase                           | putative DNA polymerase [Bacillus subtilis subsp. natto]                                             | 41% (508)  | 0.00E+00  |
| 38 | 43721 | 43918 | 66   | 7.26   | - | taagaaaggacaaatg           |                                          |                                                                                                      |            |           |
| 39 | 44015 | 44677 | 221  | 24.31  | - | gtgaaaggtgaaatataaaaaatg   | HNH endonuclease                         | putative HNH homing endonuclease [Lactobacillus phage phiJL-1]                                       | 48% (94)   | 1.00E-46  |
| 40 | 44775 | 45431 | 219  | 24.09  | - | taaggagaatgaccaactg        |                                          | hypothetical protein KQS_07715 [Flavobacterium indicum GPTSA100-9]                                   | 29% (124)  | 1.10E+00  |
| 41 | 45415 | 46197 | 261  | 28.71  | - | taaggaaagcgagagttg         | thymidine kinase                         | thymidine kinase [Eubacterium yurii subsp. margariae ATCC 43715]                                     | 33% (78)   | 1.00E-25  |
| 42 | 46218 | 46874 | 219  | 24.09  | - | aaaggagaaagattttg          | extracellular transglycosylase           | extracellular transglycosylase, with LysM peptidoglycan binding domain [Lactobacillus pentosus KCA1] | (37% (86)) | 2.00E-28  |
| 43 | 47269 | 47898 | 210  | 23.1   | - | aaaggagaaaaacatagtgatg     | phage-related HNH endonuclease           | putative HNH homing endonuclease [Lactobacillus phage phiJL-1]                                       | 52% (98)   | 1.00E-52  |
| 44 | 48029 | 48355 | 109  | 11.99  | - | ttgaaggagactgttctaag       | growth inhibitor                         | growth inhibitor [Xenococcus sp. PCC 7305] >gb[ELS03630.1]                                           | 31% (32)   | 2.00E-05  |
| 45 | 48355 | 50211 | 619  | 68.09  | - | agaaagagaaagattctatg       | single-stranded-dna-specific exonuclease | single-stranded-DNA exonuclease [Lactobacillus phage ATCC 8014-B2]                                   | 33% (194)  | 7.00E-68  |
| 46 | 50208 | 51236 | 343  | 37.73  | - | aagaaggaattttgtg           | DNA primase                              | DNA primase [Lactobacillus phage ATCC 8014-B2]                                                       | 43% (122)  | 3.00E-71  |
| 47 | 51249 | 51866 | 206  | 22.66  | - | aggagtacataaaagcatg        | HNH homing endonuclease                  | putative endonuclease [Lactobacillus phage phiAT3]                                                   | 44% (82)   | 4.00E-44  |
| 48 | 51889 | 53481 | 531  | 58.41  | - | attgggagattagattaatg       | DNA helicase                             | DNA helicase [Lactobacillus phage ATCC 8014-B2]                                                      | 48% (247)  | 6.00E-153 |
| 49 | 53481 | 53834 | 118  | 12.98  | - | gttggaaaggaaaaatcaatg      |                                          | hypothetical protein 8014-B2_0085 [Lactobacillus phage ATCC 8014-B2]                                 | 35% (42)   | 2.00E-11  |
| 50 | 53931 | 54308 | 126  | 13.86  | - | aagaaaagagacaattaagtg      |                                          |                                                                                                      |            |           |
| 51 | 54332 | 55051 | 240  | 26.4   | - | tagaaaaggaaacctatg         | deoxyguanosine kinase                    | deoxyguanosine kinase [Lactobacillus phage ATCC 8014-B2]                                             | 50% (115)  | 1.00E-73  |
| 52 | 55063 | 55815 | 251  | 27.61  | - | agcacacgaggactctgatg       |                                          | hypothetical protein Pnap_2274 [Polaromonas naphthalenivorans CJ2]                                   | 25% (43)   | 6.00E+04  |

|    |       |       |     |       |   |                           |                                    |                                                                                                                       |            |           |
|----|-------|-------|-----|-------|---|---------------------------|------------------------------------|-----------------------------------------------------------------------------------------------------------------------|------------|-----------|
| 53 | 55815 | 56315 | 167 | 18.37 | - | aatagaggaggaattatg        | phosphatidylglycerophosphatase a   | phosphatidylglycerophosphatase A [Lactobacillus reuteri]                                                              | 41% (67)   | 2.00E-39  |
| 54 | 56329 | 56550 | 74  | 8.14  | - | attgaaaggcattttatattatg   |                                    |                                                                                                                       |            |           |
| 55 | 56656 | 57297 | 214 | 23.54 | - | agaaaggagataataatcttatg   | HNH endonuclease                   | putative HNH homing endonuclease [Lactobacillus phage phiJL-1]                                                        | 59% (85)   | 2.00E-39  |
| 56 | 57436 | 58524 | 363 | 39.93 | - | agaagaaagaacaaggaacaaatg  | ATP binding cassette transporter   | ABC superfamily ATP binding cassette transporter, binding protein [Lactobacillus delbrueckii subsp. lactis DSM 20072] | 50 & (180) | 8.00E-110 |
| 57 | 58627 | 58800 | 58  | 6.38  | - | agaagaggaaaactaatg        |                                    |                                                                                                                       |            |           |
| 58 | 58800 | 58970 | 57  | 6.27  | - | tagaaagtaaatgacaatgg      |                                    |                                                                                                                       |            |           |
| 59 | 58974 | 59234 | 87  | 9.57  | - | atcgggagcggtttataatg      |                                    |                                                                                                                       |            |           |
| 60 | 59234 | 59701 | 156 | 17.16 | - | aagaagagagatttatattatg    | nucleoside deoxyribosyltransferase | Nucleoside deoxyribosyltransferase [Lactobacillus hominis CRBIP 24.179]                                               | 70% (108)  | 5.00E-77  |
| 61 | 59758 | 60081 | 108 | 11.88 | - | ctgattaaggggacgacatg      |                                    |                                                                                                                       |            |           |
| 62 | 60091 | 60342 | 84  | 9.24  | - | aagtaaagtacatattcatg      |                                    |                                                                                                                       |            |           |
| 63 | 60394 | 60666 | 91  | 10.01 | - | tagtgatacaaatgatg         |                                    |                                                                                                                       |            |           |
| 64 | 60692 | 60805 | 38  | 4.18  | - | gcacaggatgaaaaataatg      |                                    | hypothetical protein LDBND_1222 [Lactobacillus delbrueckii subsp. bulgaricus ND02]                                    | 50% (13)   | 0.046     |
| 65 | 60805 | 61011 | 69  | 7.59  | - | aaatggaggatttaataatg      |                                    |                                                                                                                       |            |           |
| 66 | 61112 | 62380 | 423 | 46.53 | - | gaagattaaaagggttactggaatg | putative DNA repair enzyme         | DNA polymerase [Lactobacillus phage ATCC 8014-B2]                                                                     | 37% (159)  | 5.00E-77  |
| 67 | 62480 | 63139 | 220 | 24.2  | - | tacgaagggaatcggttattatg   | phage antirepressor protein        | phage-related antirepressor [Lactobacillus phage Sha1]                                                                | 51% (98)   | 1.00E-52  |
| 68 | 63217 | 64305 | 363 | 39.93 | - | ttaacggaggaaaacctgtg      | atp gtp binding protein            | ATP/GTP binding protein [Lactobacillus phage ATCC 8014-B2]                                                            | 45% (160)  | 1.00E-91  |
| 69 | 64406 | 65185 | 260 | 28.6  | - | taagaacaggataaaatatactatg | phage antirepressor protein        | putative antirepressor [Lactobacillus phage c5]                                                                       | 65% (165)  | 2.00E-111 |
| 70 | 65460 | 66386 | 309 | 33.99 | - | tttagtgaggtaaaacactatg    | replication related protein        | replication protein [Lactobacillus phage ATCC 8014-B2]                                                                | 32% (104)  | 6.00E-35  |
| 71 | 67596 | 67802 | 69  | 7.59  | - | taatgggtgtaataaataatg     |                                    |                                                                                                                       |            |           |
| 72 | 67805 | 68014 | 70  | 7.7   | - | acagaaagagtgatagatg       |                                    |                                                                                                                       |            |           |
| 73 | 68011 | 68874 | 288 | 31.68 | - | aaagaggagacataaaaaatg     | HNH endonuclease                   | putative endonuclease [Lactobacillus phage phiAT3]                                                                    | 45% (93)   | 9.00E-47  |
| 74 | 68871 | 69224 | 118 | 12.98 | - | tgattggaagaaagcactatg     |                                    | hypothetical protein PAV_5c03930 [Paenibacillus alvei DSM 29]                                                         | 30% (25)   | 0.082     |
| 75 | 69221 | 69670 | 150 | 16.5  | - | attagaaacgagatttttaaatg   |                                    | conserved hypothetical protein [Enterococcus faecalis T1]                                                             | 46% (67)   | 3.00E-30  |
| 76 | 69762 | 70514 | 251 | 27.61 | - | ttgaaagagagaactaaaatg     | phage antirepressor protein        | Ant [Lactobacillus phage mv4]                                                                                         | 74% (183)  | 8.00E-131 |
| 77 | 70516 | 71175 | 220 | 24.2  | - | agaacgggaaggtttatgtg      | phage antirepressor protein        | prophage antirepressor [Leuconostoc mesenteroides subsp. cremoris ATCC 19254]                                         | 64% (144)  | 2.00E-93  |
| 78 | 71206 | 71313 | 36  | 3.96  | - | agcaaaaaggacaaaatcatg     | putative truncated antirepressor   | putative antirepressor II [Lactobacillus phage JCL1032]                                                               | 74% (31)   | 5.00E-10  |
| 79 | 71330 | 72112 | 261 | 28.71 | - | aatggaaggaaatcgtgttatg    | phage antirepressor protein        | prophage antirepressor [Lactobacillus phage AQ113]                                                                    | 67% (174)  | 5.00E-123 |
